# Supplementary material for: Bioactive Components of Myracrodruon urundeuva against SARS-CoV-2: A Computational Study
Source: MDPI journal article supplement (doi:10.3390/ddc2040039), 2023-09-27
Supplement: s1 [file s1]

# Bioactive Components of *Myracrodruon urundeuva* against SARS-CoV-2: A Computational Study

Sabrina Kelly Silva Alves <sup>1</sup>, Cássio Silva Sousa <sup>1</sup>, Edilanne Katrine Amparo Viana <sup>1</sup>, Hellen Cris Araújo Souza <sup>1</sup>, Maycon Douglas Araújo Souza <sup>1</sup>, Arthur Serejo Neves Ribeiro <sup>1</sup>, Vanessa de Sousa do Vale <sup>1</sup>, Muhammad Torequl Islam <sup>2</sup>, Joabe Lima Araújo <sup>3,\*</sup> and Jefferson Almeida Rocha <sup>1</sup>

<sup>1</sup> Research Group on Medicinal Chemistry and Biotechnology, Federal University of Maranhão, São Bernardo 65550-000, Brazil; ja.rocha@ufma.br (J.A.R.)

<sup>2</sup> Department of Pharmacy, Bangabandhu Sheikh Mujibur Rahman Science and Technology University, Gopalganj 8100, Bangladesh

<sup>3</sup> Department of Genetics and Morphology, Darcy Ribeiro University Campus, Brasília 70910-900, Brazil

\* Correspondence: joabearaujobiotec@gmail.com

**Table S1.** Molecular affinity parameters checked by vina method among the chemical constituents of *Myracrodruon urundeuva* and the SARS-CoV-2 proteins (ACE2, M<sup>Pro</sup>, RBD and Spike)

| Parts of the plant | Sl/No. | Compounds           | $\Delta G_{\text{bind}}^a$ (kcal.mol <sup>-1</sup> ) |              |                         |                | Reference |
|--------------------|--------|---------------------|------------------------------------------------------|--------------|-------------------------|----------------|-----------|
|                    |        |                     | SPIKE (6VXX)                                         | ACE2 (1R42n) | M <sup>Pro</sup> (6lu7) | RBD Spike/ACE2 |           |
|                    | 1      | Agathisflavone      | -9.7                                                 | -8.5         | -9.3                    | -9.7           | [19]      |
|                    | 2      | Alpha Bergamotene   | -5.8                                                 | -5.0         | -5.0                    | -5.9           | [20]      |
|                    | 3      | Alpha-pinene        | -5.2                                                 | -4.7         | -4.0                    | -5.2           | [20]      |
|                    | 4      | Alpha-terpineol     | -6.1                                                 | -5.0         | -4.8                    | -5.8           | [19]      |
|                    | 5      | Aromadendrin        | -8.5                                                 | -7.0         | -7.6                    | -6.8           | [19]      |
|                    | 6      | Apigenin            | -8.7                                                 | -6.7         | -7.8                    | -6.7           | [19]      |
|                    | 7      | Beta pinene         | -5.1                                                 | -4.6         | -4.6                    | -5.1           | [22]      |
|                    | 8      | 3-cerene            | -5.5                                                 | -4.8         | -4.2                    | -5.2           | [20]      |
|                    | 9      | Caryophyllene oxide | -7.6                                                 | -5.7         | -5.3                    | -6.6           | [21]      |
|                    | 10     | Cianidanol          | -7.5                                                 | -7.0         | -7.2                    | -6.6           | [19]      |
|                    | 11     | Eugenol             | -5.5                                                 | -5.1         | -4.8                    | -5.6           | [22]      |
|                    | 12     | Gallic acid         | -6.3                                                 | -5.3         | -5.5                    | -5.9           | [19]      |
|                    | 13     | Germacrene B        | -6.7                                                 | -5.6         | -5.2                    | -6.1           | [22]      |
|                    | 14     | Isoquercitrin       | -8.0                                                 | -7.6         | -8.1                    | -8.1           | [19]      |
|                    | 15     | Luteolin            | -9.0                                                 | -7.1         | -7.5                    | -6.9           | [19]      |

|             |    |                            |      |      |      |      |      |
|-------------|----|----------------------------|------|------|------|------|------|
| <b>Leaf</b> | 16 | Limonene                   | -5.3 | -4.9 | -4.4 | -5.8 | [20] |
|             | 17 | Linalool                   | -5.2 | -4.3 | -4.1 | -4.6 | [20] |
|             | 18 | Methyl gallate             | -6.2 | -5.1 | -5.6 | -5.9 | [20] |
|             | 19 | Myrcenol                   | -4.4 | -4.0 | -4.0 | -5.1 | [20] |
|             | 20 | Nerolidol                  | -6.1 | -5.1 | -4.5 | -4.9 | [20] |
|             | 21 | Quercetin                  | -9.0 | -7.4 | -7.5 | -7.0 | [19] |
|             | 22 | Quercitrin                 | -8.1 | -8.0 | -9.0 | -7.6 | [19] |
|             | 23 | Spathulenol                | -7.2 | -6.0 | -5.6 | -6.4 | [21] |
|             | 24 | Sylvestrene                | -5.6 | -5.0 | -4.7 | -5.4 | [22] |
| <b>Bark</b> | 25 | 4-Hydroxy-N-methyl proline | -5.2 | -4.4 | -5.6 | -4.7 | [22] |
|             | 26 | Beta Sitosterol            | -7.9 | -6.9 | -6.3 | -7.1 | [22] |
|             | 27 | Cryptochlorogenic acid     | -8.6 | -7.2 | -7.6 | -7.3 | [22] |
|             | 28 | 4-p-Coumaroylquinic acid   | -8.5 | -7.0 | -4.6 | -7.2 | [22] |
|             | 29 | Feruloyl-D-quinic acid     | -8.6 | -7.0 | -7.5 | -7.1 | [22] |
|             | 30 | Gallocatechin              | -8.6 | -7.1 | -7.2 | -6.6 | [22] |
|             | 31 | Gallocatechin gallate      | -8.7 | -8.2 | -9.0 | -7.9 | [22] |
|             | 32 | Galloylquinic acid         | -8.4 | -6.6 | -6.7 | -6.9 | [22] |
| <b>Seed</b> | 33 | Alpha-Elemene              | -8.4 | -6.0 | -5.0 | -5.7 | [20] |
|             | 34 | Beta-Chamigrene            | -6.6 | -5.8 | -5.2 | -6.1 | [20] |
|             | 35 | Beta-Guaiene               | -7.2 | -6.3 | -5.3 | -6.3 | [20] |
|             | 36 | Ethyl                      | -4.6 | -4.3 | -4.0 | -5.1 | [20] |
|             | 37 | Geranylacetone             | -5.5 | -4.9 | -4.4 | -5.6 | [20] |
|             | 38 | Methyl-2-benzoate          | -5.8 | -4.6 | -4.4 | -5.5 | [20] |
|             | 39 | Patchoulane                | -6.5 | -5.7 | -5.3 | -6.6 | [20] |
| <b>Root</b> | 40 | Eriodictiol                | -8.9 | -7.1 | -7.3 | -6.9 | [23] |
|             | 41 | Mercaptan                  | -5.6 | -4.7 | -4.8 | -4.3 | [23] |
|             | 42 | Naringenin                 | -8.7 | -7.8 | -8.0 | -7.5 | [23] |
|             | 43 | Taxifolin                  | -9.0 | -7.1 | -7.4 | -6.9 | [23] |
|             | 44 | Trihydroxyflavone          | -8.3 | -6.7 | -7.9 | -6.7 | [23] |
